# Supplementary material for: Facile synthesis of copper nanoparticles in glycerol at room temperature: formation mechanism
Source: Royal Society of Chemistry journal article supplement (doi:10.1039/c4ra16919k), 2015-01-01
Supplement: c4ra16919k1.pdf [file c4ra16919k1.pdf]

## XPS analysis

### **Experimental section**

To obtain dried nanoparticle, 50 mL sol was diluted with ethanol (99.9%) at ratio (v) 1:1. The diluted sample was centrifuged at 10000 rpm for 30 min and the precipitated solid was collected and dried in vacuum dryer at 80 °C for 6 h. XPS data were acquired using a PerkinElmer PHI 5400 X-ray photoelectron spectrometer. This system was equipped with Mg X-ray source operated at 300 W (15 kV, 20 mA). The carbon (C 1s) line at 285.0 eV was used as the reference line.

### **Results and discussion section**

A typical XPS spectrum of Copper nanoparticle was measured and the spectrum of Cu 2p<sub>3/2</sub> is depicted in Fig. S1a. The Cu 2p<sub>3/2</sub> spectrum shows that the Cu<sup>2+</sup> peak lies at 932.98 eV<sup>1</sup>, with two shake-up satellites at higher binding energy (BE 942.35 and 940.85 eV)<sup>2, 3</sup>. The Cu<sup>1+</sup> peak was appeared at 931.55 eV which attributed to Cu<sub>2</sub>O<sup>1, 4</sup>. Apart from that, Fig. S1b shows O 1s core level spectrum is broad and fitted by 2 different peaks. The peak located at lower energy (BE 529.50 eV) is attributed to O<sup>2-</sup> in CuO<sup>3, 5, 6</sup> while the other peak at higher energy (BE 530.30 eV) is ascribed to O<sup>1-</sup> in Cu<sub>2</sub>O<sup>5, 6</sup>. The binding energy, FWHM and area of Cu 2p<sub>3/2</sub> are summarized in Table S1. The XPS results indicate that the sample is composed of CuO and Cu<sub>2</sub>O. The XPS result was not in agreement with XANES result, where 57.6% of CuO and 42.4% of Cu<sub>2</sub>O was found in the solids separated from sol; while, 47% Cu<sup>0</sup>, 23% of CuO and 30% CuCl<sub>2</sub> was acquired in the sol via XANES fitting. The concentration of oxide species increased, it might be due to oxidation happened during the XPS sample preparation.

Table S1 The results of deconvolution of XPS Cu 2p<sub>3/2</sub> peaks

| Binding energy (eV) | Cu phase          | FWHM | Area     | Percentage (%) |
|---------------------|-------------------|------|----------|----------------|
| 931.55              | Cu <sub>2</sub> O | 2.76 | 1852.811 | 42.43          |
| 932.98              | CuO               | 3.39 | 860.6919 | 19.71          |
| 940.85              | CuO               | 3.90 | 1074.291 | 24.60          |
| 942.35              | CuO               | 2.36 | 579.304  | 13.26          |

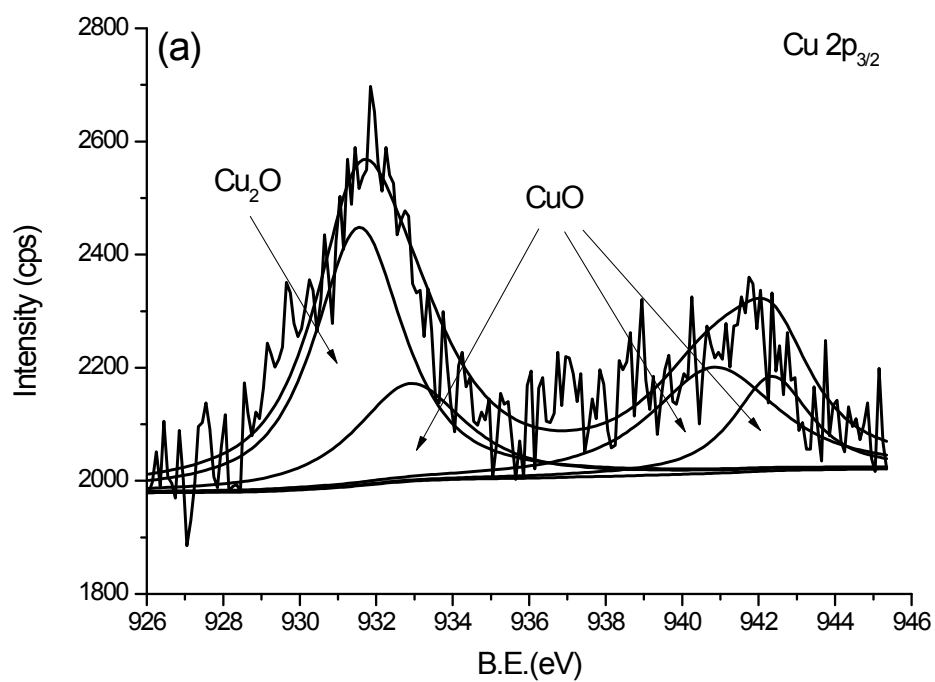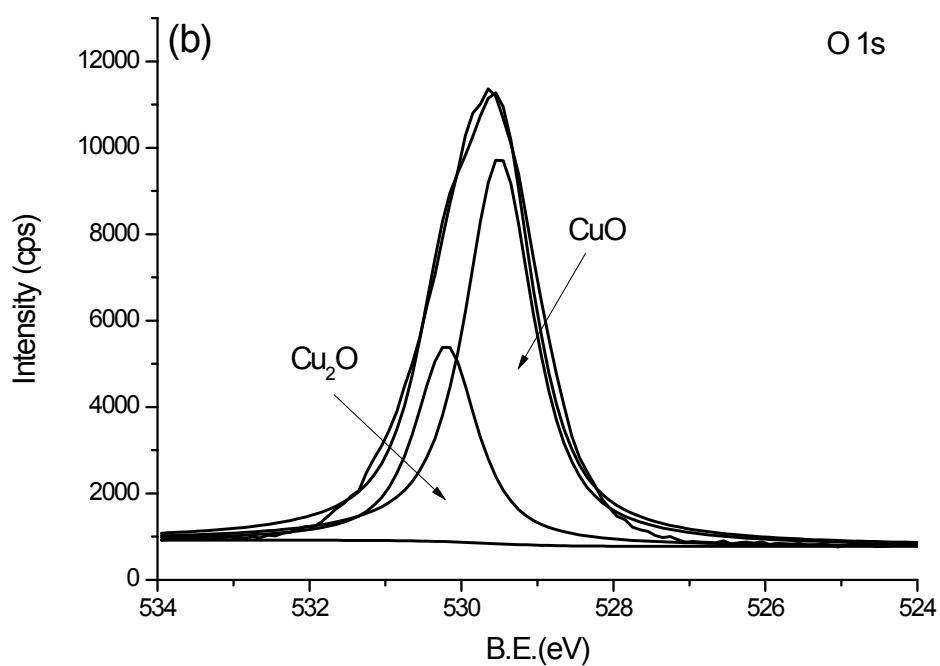

Fig. S1 Typical deconvolution of Cu 2p<sub>3/2</sub> (a) and O 1s (b) main peak of 6 h sample.

## References

1. S. Karamat, R. S. Rawat, T. L. Tan, P. Lee, S. V. Springham, R. Chen and H. D. Sun, *Journal of Superconductivity and Novel Magnetism*, 2013, 26, 187-195.
2. J.-Y. Park, Y.-S. Jung, J. Cho and W.-K. Choi, *Appl. Surf. Sci.*, 2006, 252, 5877-5891.
3. V. V. T. Padil and M. Černík, *International journal of nanomedicine*, 2013, 8, 889.
4. L. Winnubst, S. Ran, E. A. Speets and D. H. A. Blank, *J. Eur. Ceram. Soc.*, 2009, 29, 2549-2557.
5. J. Morales, L. Sanchez, F. Martin, J. R. Ramos-Barrado and M. Sanchez, *Thin Solid Films*, 2005, 474, 133-140.
6. J. Morales, L. Sanchez, F. Martin, J. R. Ramos-Barrado and M. Sánchez, *Electrochimica Acta*, 2004, 49, 4589-4597.
